# Supplementary material for: Genetically Engineered Pigs as Efficient Salivary Gland Bioreactors for Production of Therapeutically Valuable Human Nerve Growth Factor
Source: MDPI journal article supplement (doi:10.3390/cells11152378), 2022-08-02
Supplement: s1 [file s1]

**Table S1.** Sequences of primers for PCR analysis of hNGF-TG pigs

| Gene           | Primer sequences (5'-3')  | Amplicon length (bp) |
|----------------|---------------------------|----------------------|
| $\beta$ -actin | F: CACTGCCGCATCCTCTTCCT   | 528                  |
|                | R: CTCCTGCTTGCTGATCCACATC |                      |
| hNGF           | F: GAACTCATATTGTACCACGACT | 319                  |
|                | R: CCCCAGAATAGAATGACACC   |                      |
| EGFP           | F: GCCACAAGTTCAGCGTGTCC   | 584                  |
|                | R: CATGTGATCGCGCTTCTCGTT  |                      |
| PB-transposase | F: CAGATGCCTGAGGATGGAC    | 803                  |
|                | R: CGTTGTGGCTGTAGATGATGA  |                      |

**Table S2.** Sequences of primers for inverse PCR analysis of transgene integration sites in the genome of hNGF-TG pigs

| Primer name   | Primer sequences (5'-3') |
|---------------|--------------------------|
| EcoRV-LA-F    | GCATGATTATCTTTTACGTGAC   |
| EcoRV-LA-R    | CTGAGATGTCCTAAATGCAC     |
| EcoRV-RA-F    | CGACCACTACCAGCAGAACACC   |
| EcoRV-RA-R    | CCACCAAGTCCTAGGCCCCAT    |
| BamHI-LA-F    | GATGTAGCCCTCAAAGTCTC     |
| BamHI-LA-R    | CTTATTATGCTGTCGGGTCA     |
| BamHI-RA-F    | CCACTACCAGCAGAACACC      |
| BamHI-RA-R    | CTTCAGTGACAACGTCGAGCA    |
| IN-EcoRV-RA-F | CCGTGCCTTCCTTGACCCTG     |
| IN-EcoRV-RA-R | CCACCAAGTCCTAGGCCCCAT    |

**Table S3.** Sequences of 11 designed pNGF-targeting sgRNAs

| sgRNA name | Sequences (5'-3')        |
|------------|--------------------------|
| sgRNA1-F   | CACCGGGACATTGCTCTCGGTGTG |
| sgRNA1-R   | AAACCACACCGAGAGCAATGTCCC |

|           |                           |
|-----------|---------------------------|
| sgRNA2-F  | CACCGATCAGAGTGTAGAACAACA  |
| sgRNA2-R  | AAACTGTTGTTCTACACTCTGATC  |
| sgRNA3-F  | CACCGTTTAGTCCAGTGGGCTTGG  |
| sgRNA3-R  | AAACCCAAGCCCAGTGGACTAAAC  |
| sgRNA4-F  | CACCGCTCTTCTGATCGGCGTAC   |
| sgRNA4-R  | AAACGTACGCCGATCAGAAGAGC   |
| sgRNA5-F  | CACCGCGGTTTATCCGAATCGACA  |
| sgRNA5-R  | AAACTGTCGATTTCGGATAAACCGC |
| sgRNA6-F  | CACCGCGTGCTCAGCAGGAAGGCG  |
| sgRNA6-R  | AAACCGCCTTCCTGCTGAGCACGC  |
| sgRNA7-F  | CACCGTGCGTGCTCAGCAGGAAGG  |
| sgRNA7-R  | AAACCCTTCCTGCTGAGCACGCAC  |
| sgRNA8-F  | CACCGGCTGGGGCGATAGCCGCC   |
| sgRNA8-R  | AAACGGCGGCTATCGCCCCAGCC   |
| sgRNA9-F  | CACCGGCTGGGGCGATAGCCGCCA  |
| sgRNA9-R  | AAACTGGCGGCTATCGCCCCAGCC  |
| sgRNA10-F | CACCGCAGACCCGCAACATCACTG  |
| sgRNA10-R | AAACCAGTGATGTTGCGGGTCTGC  |
| sgRNA11-F | CACCGGGGCGATAGCCGCCAGGG   |
| sgRNA11-R | AAACCCCTGGCGGCTATCGCCCC   |

**Table S4.** Sequences of primers for T7E1 assay

| Primer name | Sequences (5'-3')       | Amplicon length<br>(bp) |
|-------------|-------------------------|-------------------------|
| pNGF-E2-1F  | AATGGTCAATCCCGGTCCC     | 632                     |
| pNGF-E2-1R  | ACCTCCTTGCCCTTGATGTCC   |                         |
| pNGF-E2-2F  | CAAGCGGTCGTCATCCCAC     | 483                     |
| pNGF-E2-2R  | ACTATAAATTACCATGCAGTCCT |                         |

**Table S5.** Sequences of primers for PCR analysis of double-transgenic hNGF-TG/pNGF-KO cells and pigs

| Primer name | Sequences (5'-3')       | Amplicon length (bp)  |
|-------------|-------------------------|-----------------------|
| P1-F        | CTGAGGCTTCAAGACAAGTCCC  | WT: 2000,             |
| P1-R        | TTTTCAGCCAAAAGCAGACCTCC | hNGF-TG/pNGF-KO: 4900 |

**Table S6.** Sequences of expected PCR amplicon for off-target analysis

| SgRNA<br>ID no. | Potential<br>off-target sites    | Sequences of expected PCR amplicon containing the primers (with underline)<br>and the potential off-target sites (with bold font)                                                                                                                                                                                                                                                                                                                                                                                                                 |
|-----------------|----------------------------------|---------------------------------------------------------------------------------------------------------------------------------------------------------------------------------------------------------------------------------------------------------------------------------------------------------------------------------------------------------------------------------------------------------------------------------------------------------------------------------------------------------------------------------------------------|
| sgRNA 5         | mm4__1 258.00<br>Mbp_1_257997134 | <u>GTGTAGGTTGCCAGACCCTCTAATAAACTGGCCCAGAGTCGGGTGAGTCATGGTTGCACCTCCC</u><br>AAGTCACAGGCTATCCTCACAAGCTGTGCACCTAATTAAGCTCTGATAATCTGTATAAATTAGC<br>ATTTGCTAGTGATAAATATCACGTACCAAGCCTTAAATAATACATTAGCCTTAATTGAATAAATG<br>CATATATTATGGCCTTCTAATGCATATTTGCCATAATGAGTTATCTTTTATGCACAAACAAACAG<br>CAATTCTGACTAATCAGGTGGGGTAATTGTGCTATTAATAATTCCAGGTTTCCTGAGAAAGGTCT<br>CAGTGATGGTCAGATGACAGAAAAGNNNNNNNCATCAACAACAAAACATTATTT <b>CCTTGACTA</b><br><b>TTCGGATAAACTTCT</b> TATTTGGGTATTTCACTACCTTTGAACCCCTAGAGTTTTGTAATTAATAT<br>CAACGTCTATACCCCTTTCCCACTCCC |
|                 | mm4__4 14.53<br>Mbp_4_14533954   | <u>GGACAGGAAGACCAGCCTTCCACCTGGGCCACTGGGGAGCACCCCAGCCACTACATGGCTGCC</u><br>GATGTGAAGTCAGTAAGAAGCTTCTCTCTCGTGTTCTATGTCACACCCTCCGTGAACCAGAGGACC<br>TGAACCACCAAGGGAACAAATTCACCATTTCCACTGTAAACCAACAGAAGGAGAAATGCTTGTC<br>ATTTTCTTCTTCTGCTCTTGCCAAGTATCCATCAGAAACCTATTTAATGTGACTATAAGGTCAGA<br>ACAAAAAGAACTAGCAAAAGGTCTATTTGGGGAATACTACATTTTCTTTAAATCCATAAGTTA<br>GCTTCTAACATGCATAAGTT <b>CCGTGAGGATTCGGATAAACAGGAAGTCCAACTTCAAATCCCTT</b><br>GTCTTTAGGTCAGACCACAGATCTACTGCACAGTATGAGGTCA <b>ATCCAAGGACATCAGGCTGGA</b>                                  |
|                 | mm4__4 22.71<br>Mbp_4_22706127   | <u>GAGGGCCCTGGTTTAGCAAA</u> TATCTTTGTACTATTCAATTTCAAGAGTAAAGGGTTTCCTTATAAAA<br>CTCAGAACATAGTTTGAAAACCTTTCTGTGATTGAGATCCTTCTCCTG <b>CCTTGTCATTTTCAGATAA</b><br><b>ACCTCTGGTTCTAAAGCACTAATGTT</b> CCTCTAGTGTTCTATTAAGTTAGATGTTTTTCTATAATTTT<br>AAACAAATCTAAGTCAAATGAAAATTTAAAAATATGGATTTCAAACAAACGGTTTAACAAGAAAT                                                                                                                                                                                                                                    |

|          |                                  |                                                                                                                                                                                                                                                                                                                                                                                                                                                                     |
|----------|----------------------------------|---------------------------------------------------------------------------------------------------------------------------------------------------------------------------------------------------------------------------------------------------------------------------------------------------------------------------------------------------------------------------------------------------------------------------------------------------------------------|
| sgRNA 10 |                                  | GTCTACTCTATTACACTTGTGACAAATCTGGTTAAGACCTCATAAGAATTATATAATTGGCTTCAG<br>AACAGAAACAATTTTTTCATTAATATAACTAGCAAAAATATTTCTATAATCTCTTCTTGCCCCCATAT<br>GAAAATCAGT <u>TAAGGGAAAGCTCAGCTGGC</u>                                                                                                                                                                                                                                                                                |
|          | mm4__14 55.82<br>Mbp_14_55822569 | <u>TAAAGTGGGAATGGTGCCCCACACCTCCTGAGAACGAGAGTCTGGTGAGTTTGCACCAAGATGAG</u><br>AACTGCCATTTTAAGAGCAGCTTTCCCCTCCTCAAATACCAGGCTCTCCCTTCCAGAAAGCCCCAG<br>ACTTCCCAGCTTCCTTCTGCTGAGAGATTAATGATCTGCTTCCAGGGGGCCACAGGTGCCCCGGCT<br>GTCCACTTAGATGAGCATAAAAAATCCCCAAAG <b>CAGAAAAGCAACAACACTGAGGGTCTCCTTTG</b><br>ACACCCAAGGGAAACTGCCCCAGAGGAAAGCCCTGCAGGCCAGGGCACGGGCACAAGTATACGA<br>ACTGAGGCAAAGTGACTGGTATCTAGGATGCGCTGCAAGAAATTCCCTCGTTGGGTCTGTCTTTGTC<br>TGGATCCTGATGTCCACCG |
|          | mm4__1 253.31<br>Mbp_1_253306534 | <u>TGCTTGAATGGATGCATGTGGGGCCAGCAGGACTTGATGGATTAGCCGTAGACTGGGGAACAGG</u><br>TGTCAAGGATTGTACTCAGGTTTCAGGCTTGTGCACATGGATAGGTCCTGGAGGTGCTGACTGGGT<br>GGGAGAGCAGGTTTGTGGGGACAGACCTA <b>AGTGACGTTGCAGGTCTGGGTCCATGCATTGAGCA</b><br>GGCTCTTAGGTGTGTTAGGGTTCACAGAAGCCGTTGGAGATGTGATTCTGATGCCTTCTCATTACCC<br>ATCTGTAAAACTTCATTTTCTACTTGTTGAAGGTATGATATGTTTAGAAAAAATAATTTATATTTGCA<br>TATTTTGGATTGCCAACTTGTCTTCTTCAATCAGTTTTCTAGGCCTTTGGGATTGTACCC                            |
